# Supplementary material for: Facile fabrication of 3D flower-like heterostructured g-C3N4/SnS2 composite with efficient photocatalytic activity under visible light
Source: Royal Society of Chemistry journal article supplement (doi:10.1039/c4ra03843f), 2014-01-01
Supplement: c4ra03843f1.pdf [file c4ra03843f1.pdf]

## Supplementary Information

### **Facile fabrication of 3D flower-like heterostructured g-C<sub>3</sub>N<sub>4</sub>/SnS<sub>2</sub> composite with efficient photocatalytic activity under visible light**

Meng Sun,<sup>a</sup> Qing Yan,<sup>a</sup> Tao Yan,<sup>b,c</sup> Mengmeng Li,<sup>b</sup> Dong Wei,<sup>a</sup> Zhongpeng Wang,<sup>a</sup> Qin Wei,<sup>d</sup> and Bin Du\*<sup>a</sup>

<sup>a</sup>*School of Resources and Environment, University of Jinan, Shandong Provincial Engineering Technology Research Center for Ecological Carbon Sink and Capture Utilization, Jinan250022, P.R. China. Fax: +86 531-82765969; Tel: +86 531-82769235; E-mail: bindujn@163.com*

<sup>b</sup>*School of Civil Engineering and Architecture, University of Jinan, Jinan250022, P.R. China.*

<sup>c</sup>*School of Chemistry, Beijing Institute of Technology, Beijing 100081, P.R. China*

<sup>d</sup>*Key Laboratory of Chemical Sensing & Analysis in Universities of Shandong, School of Chemistry and Chemical Engineering, University of Jinan, Jinan 250022, P.R. China*

---

Corresponding Author: prof. Bin Du; Email: bindujn@163.com;

Tel. :+86 531-82769235; Fax: +86 531-82765969

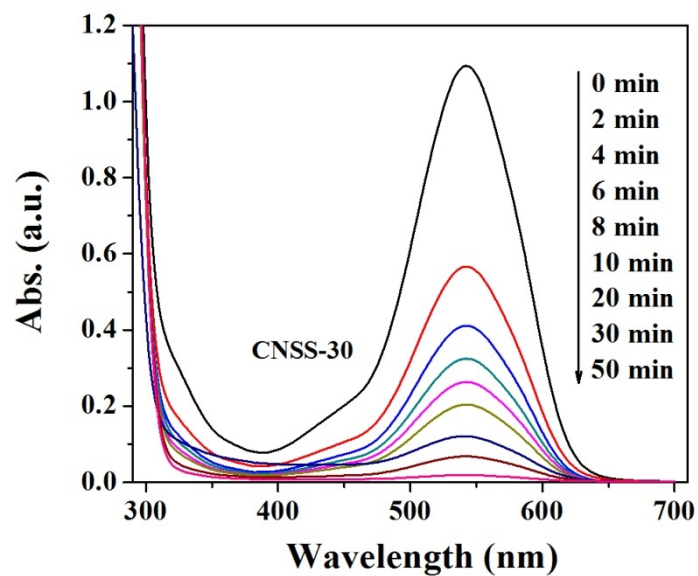

**Figure S1.** The typical temporal evolution of the spectral changes of DPC-Cr(VI) complex solutions at various exposure time in the presence of CNSS-30 composite.

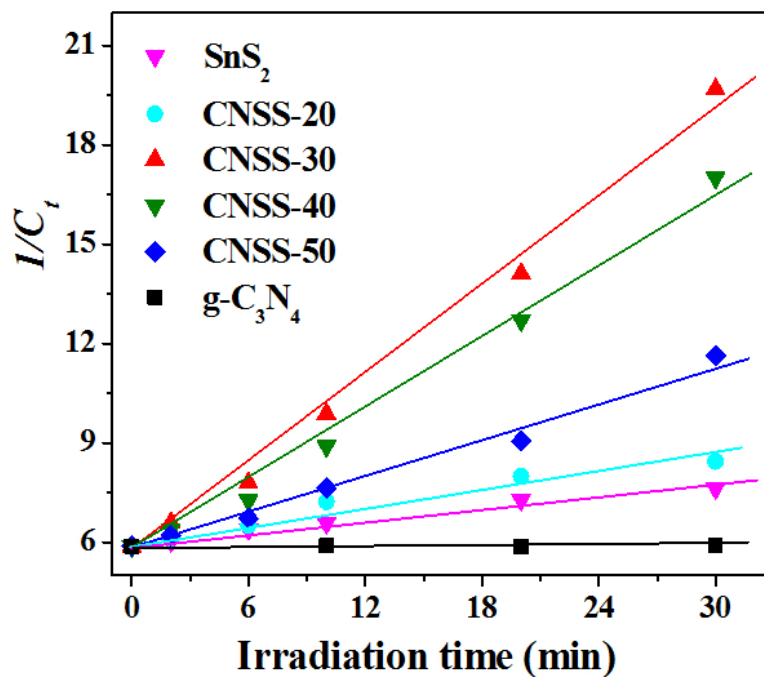

**Figure S2.** The kinetics of Cr(VI) photocatalytic reduction over  $g\text{-C}_3\text{N}_4$ ,  $\text{SnS}_2$ , and  $g\text{-C}_3\text{N}_4/\text{SnS}_2$  composites under visible light irradiation.
